# Supplementary material for: Porous supramolecular assemblies and functional properties of perhydroxylated cucurbit[6]uril and polyoxometallates
Source: Royal Society of Chemistry journal article supplement (doi:10.1039/c9nj01116a), 2019-01-01
Supplement: c9nj01116a1.pdf [file c9nj01116a1.pdf]

## Porous Supramolecular assemblies and functional properties of perhydroxylated cucurbit[6]uril and polyoxometallates

Xi Xia,<sup>a</sup> Wei Wei Ge,<sup>b</sup> Haiyong Chen,<sup>a</sup> Zhu Tao,<sup>a</sup> Yunqian Zhang<sup>\*a</sup> Gang Wei<sup>\*c</sup> and Kai Chen<sup>\*b</sup>

---

<sup>a</sup> Key Laboratory of Macrocyclic and Supramolecular Chemistry of Guizhou Province, Guizhou University, Guiyang 550025, China

E-mail: [sci.yqzhang@gzu.edu.cn](mailto:sci.yqzhang@gzu.edu.cn) (Yun-Qian Zhang)

<sup>b</sup> Collaborative Innovation Center of Atmospheric Environment and Equipment Technology, Jiangsu Key Laboratory of Atmospheric Environment Monitoring and Pollution Control, School of Environmental Science and Engineering, Nanjing University of Information Science & Technology, Nanjing 210044. E-mail: [kaichen85@nuist.edu.cn](mailto:kaichen85@nuist.edu.cn) or [catqchen@163.com](mailto:catqchen@163.com)

<sup>c</sup> CSIRO Manufacturing Flagship, PO Box 218, Lindfield, NSW 2070, Australia. E-mail: [Gang.Wei@csiro.au](mailto:Gang.Wei@csiro.au).

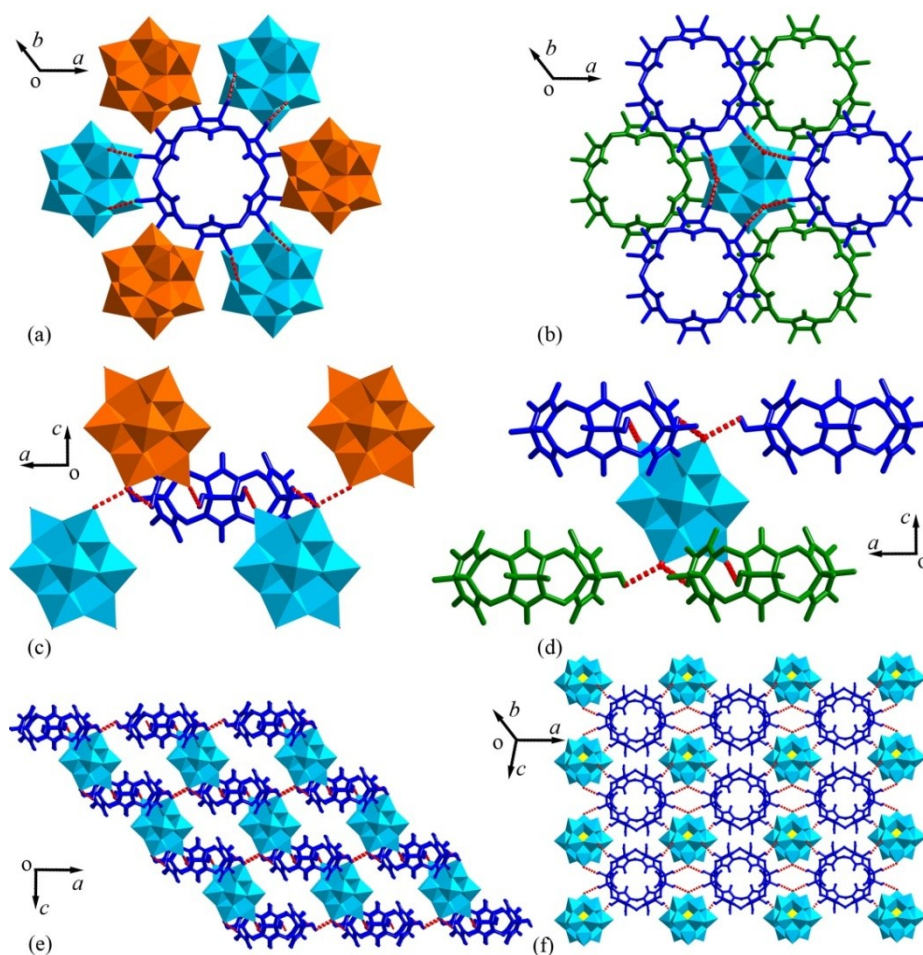

**Fig. S1.** Crystal structure of another A: (a and c) top view and side view of the detailed interactions of each  $(\text{HO})_{12}\text{Q}[6]$  molecule with six  $[\text{PWO}_{40}]^{3-}$  anions; (b and d) top view and side view of the detailed interactions of each  $[\text{PWO}_{40}]^{3-}$  anion with six  $(\text{HO})_{12}\text{Q}[6]$  molecules; (e) overview of the supramolecular stacking of  $(\text{HO})_{12}\text{Q}[6]$  molecules and  $[\text{PWO}_{40}]^{3-}$  anions along  $a$  and  $b$  axes; (f) step-like supramolecular network of  $(\text{HO})_{12}\text{Q}[6]$  molecules and  $[\text{PWO}_{40}]^{3-}$  anions along the  $c$  axes.

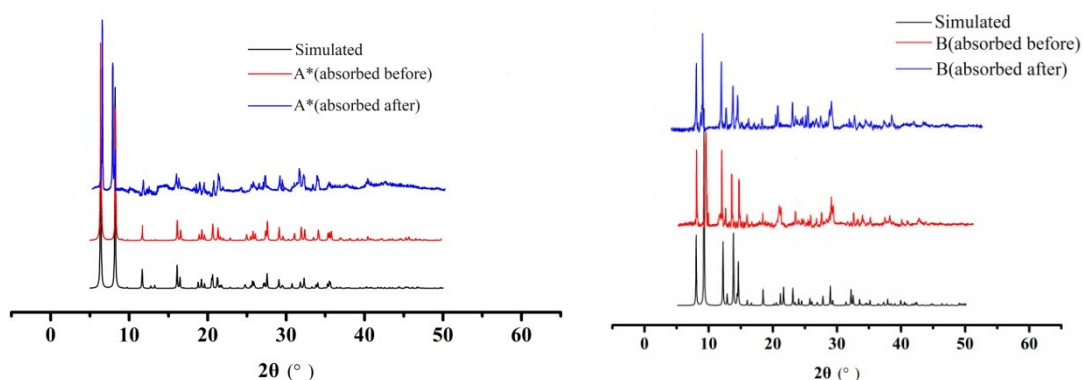

**Fig. S2.** Powder X-ray diffraction analysis of A\* and B accompanied by simulations.

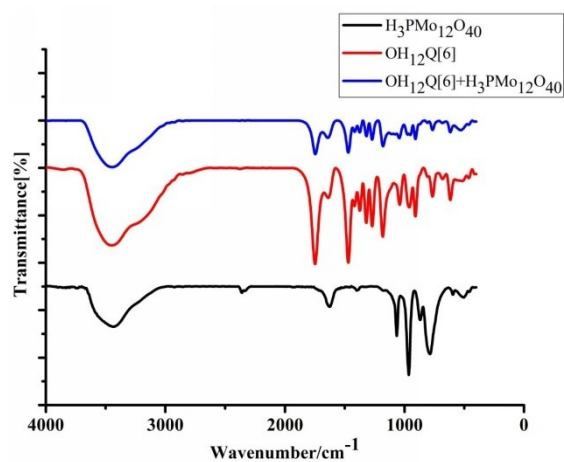

**Fig. S3.** FTIR spectra of  $(\text{HO})_{12}\text{Q}[6]$ ,  $[\text{PMo}_{12}\text{O}_{40}]^{3-}$ , hybrid of  $(\text{HO})_{12}\text{Q}[6]$  with  $[\text{PMo}_{12}\text{O}_{40}]^{3-}$  anions

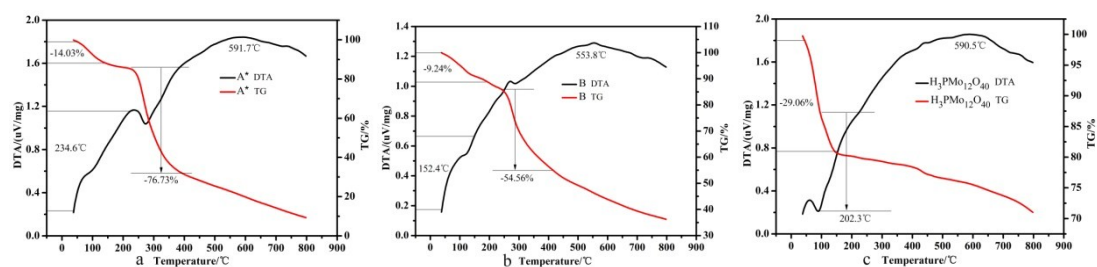

**Fig. S4.** DTA and TG profiles of (a) A\*; (b) B; (c)  $\text{H}_3\text{PMo}_{12}\text{O}_{40}$ .

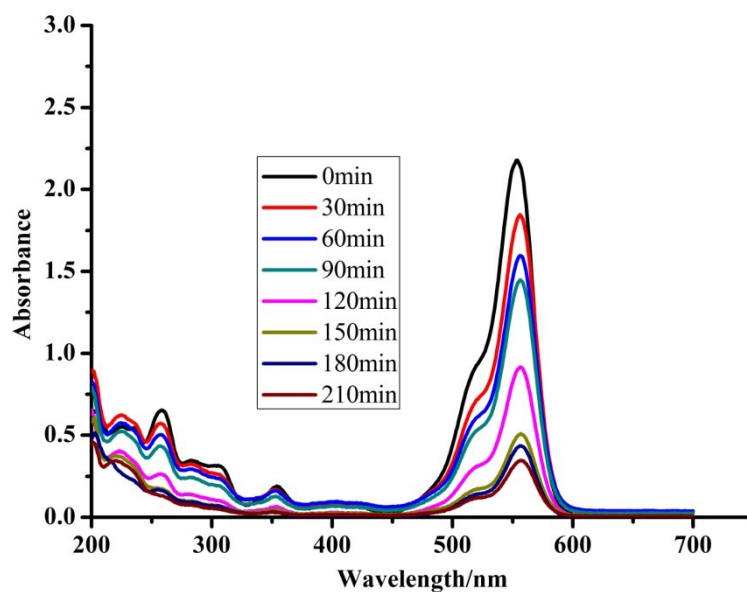

**Fig. S5.** Time-dependent UV/vis spectral changes of the rhodamine B solution in the presence of A\* under visible light irradiation.

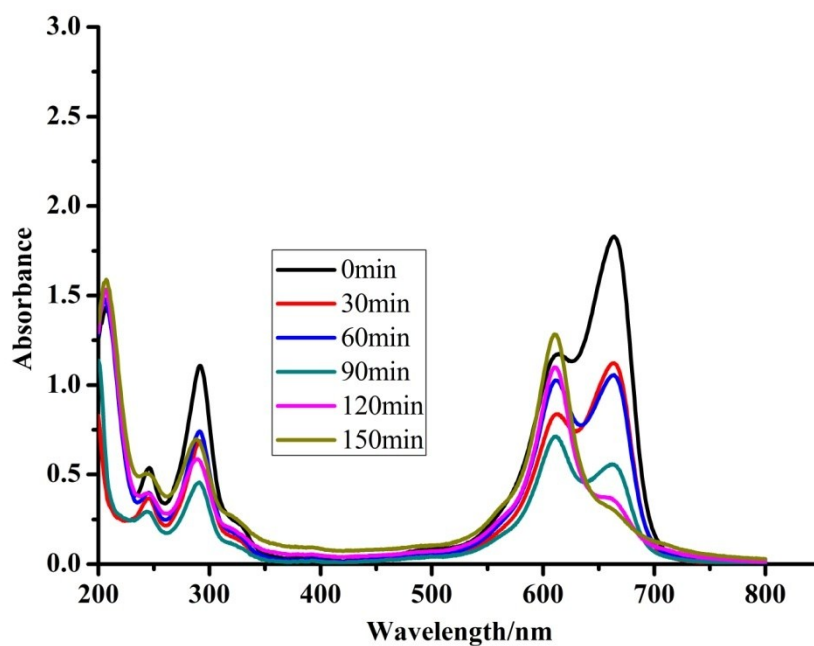

**Fig. S6.** Time-dependent UV/vis spectral changes of the acriflavine solution in the presence of A\* under visible light irradiation.

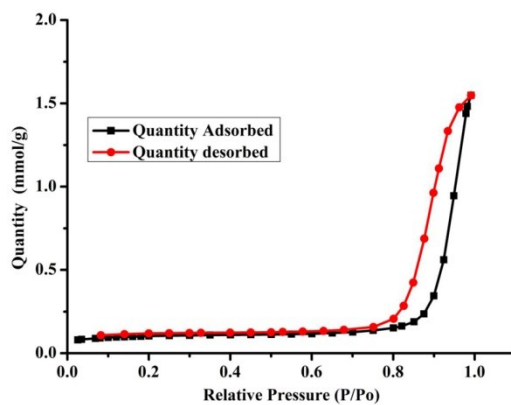

**Fig.S7** The sorption isotherms of N<sub>2</sub> at 77 K by a micrometrics ASAP2020HD88 automated Adsorption analyser. ■ symbol = adsorption and, ● symbol = desorption of **A\***.

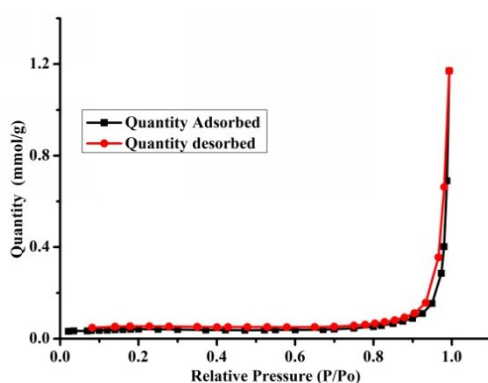

**Fig. S8** The sorption isotherms of N<sub>2</sub> at 77 K by a micrometrics ASAP2020HD88 automated Adsorption analyser. ■ symbol = adsorption and, ● symbol = desorption of **B**.

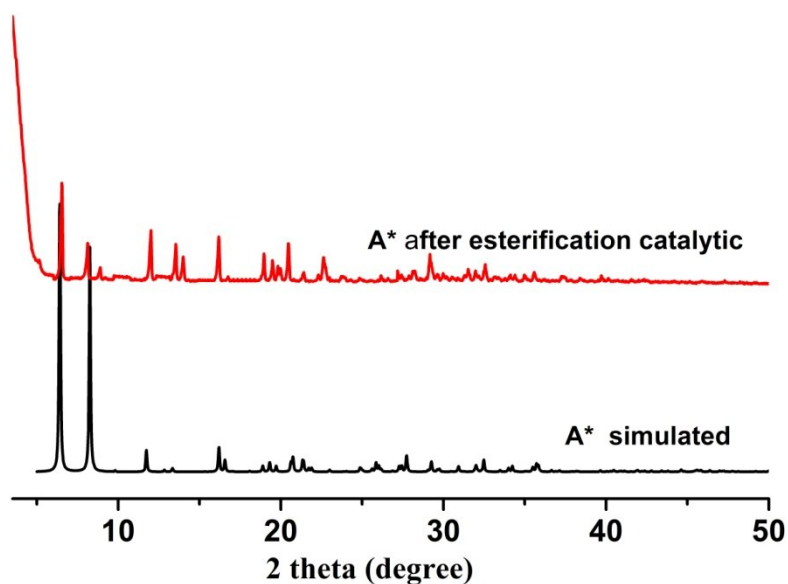

**Fig. S9** Powder X-ray diffraction analysis of **A\***: simulated and after etherification catalytic.

**Table S1.** Normalized adsorption data of **A\*** and **B** for the selected volatile compounds ( $\text{g}\cdot\text{g}^{-1}$ )

| Volatiles          | <b>A*</b> | <b>B</b> |
|--------------------|-----------|----------|
| tetrachloromethane | 0.23      | 0.08     |
| trichloromethane   | 0.38      | 0.20     |
| dichloromethane    | 0.26      | 0.08     |
| acetonitrile       | 0.12      | 0.09     |
| ethoxyethane       | 0.14      | 0.07     |
| ethanol            | 0.11      | 0.09     |
| acetone            | 0.22      | 0.33     |
| methanol           | 0.18      | 0.28     |

**Table S2** Crystallographic data for compounds **A\***, **A** and **B**

| Complex                                              | <b>A*</b>                                                               | <b>A</b>                                                               | <b>B</b>                                                          |
|------------------------------------------------------|-------------------------------------------------------------------------|------------------------------------------------------------------------|-------------------------------------------------------------------|
| empirical formula                                    | $\text{C}_{36}\text{H}_{119}\text{N}_{24}\text{O}_{104}\text{PMo}_{12}$ | $\text{C}_{36}\text{H}_{161}\text{N}_{24}\text{O}_{125}\text{PW}_{12}$ | $\text{C}_{36}\text{H}_{77}\text{N}_{24}\text{O}_{43}\text{Cl}_3$ |
| formula weight                                       | 3734.80                                                                 | 5168.06                                                                | 1640.57                                                           |
| crystal system                                       | hexagonal                                                               | hexagonal                                                              | hexagonal                                                         |
| space group                                          | R -3m                                                                   | R -3                                                                   | R -3c                                                             |
| $a$ (Å)                                              | 18.0014(11)                                                             | 18.096(5)                                                              | 22.317(3)                                                         |
| $b$ (Å)                                              | 18.0014(11)                                                             | 18.096(5)                                                              | 22.317(3)                                                         |
| $c$ (Å)                                              | 29.4043(18)                                                             | 29.247(9)                                                              | 22.272(3)                                                         |
| $\alpha$ (°)                                         | 90                                                                      | 90.00                                                                  | 90.00                                                             |
| $\beta$ (°)                                          | 90                                                                      | 90.00                                                                  | 90.00                                                             |
| $\gamma$ (°)                                         | 120                                                                     | 120.00                                                                 | 120.00                                                            |
| $V$ (Å <sup>3</sup> )                                | 8251.9                                                                  | 8294(4)                                                                | 9606(2)                                                           |
| $Z$                                                  | 3                                                                       | 3                                                                      | 6                                                                 |
| $D_{\text{calcd}}$ ( $\text{g}\cdot\text{cm}^{-3}$ ) | 2.255                                                                   | 3.104                                                                  | 1.701                                                             |

|                                             |        |        |        |
|---------------------------------------------|--------|--------|--------|
| $\mu(\text{MoK}\alpha)$ (mm <sup>-1</sup> ) | 1.481  | 1.47   | 0.273  |
| T (K)                                       | 293(2) | 293(2) | 293(2) |
| Unique reflns                               | 1991   | 4426   | 2677   |
| Obsdreflns                                  | 1678   | 3410   | 1881   |
| Params                                      | 122    | 213    | 133    |
| $R_{\text{int}}$                            | 0.0663 | 0.0588 | 0.0608 |
| R [I > 2 $\sigma$ (I)] <sup>a</sup>         | 0.0755 | 0.0502 | 0.0712 |
| wR[I>2 $\sigma$ (I)] <sup>b</sup>           | 0.1657 | 0.1406 | 0.2209 |
| R [all data] <sup>a</sup>                   | 0.0867 | 0.0694 | 0.0913 |
| wR [all data] <sup>b</sup>                  | 0.1721 | 0.1494 | 0.2355 |
| GOF on F <sup>2</sup>                       | 1.087  | 1.064  | 1.129  |

<sup>a</sup> $R_1 = \sum ||F_o| - |F_c|| / \sum |F_o|$ . <sup>b</sup> $wR_2 = \sum w(|F_o|^2 - |F_c|^2) / \sum w(F_o^2)^{1/2}$ , where  $w = 1 / [2(F_o^2) + (aP)^2 + bP]$ ;  $P = (F_o^2 + 2F_c^2) / 3$ .
